# Supplementary material for: State Abortion Policy and Moral Distress Among Clinicians Providing Abortion After the Dobbs Decision
Source: PubMed Central journal article supplement (PMC11294965; doi:10.1001/jamanetworkopen.2024.26248), 2024-08-01
Supplement: jamanetwopen-e2426248-s001.pdf [file jamanetwopen-e2426248-s001.pdf]

## Supplemental Online Content

Rivlin K, Bornstein M, Wascher J, Turner AN, Norris AH, Howard D. State abortion policy and moral distress among clinicians providing abortion after the *Dobbs* decision. *JAMA Netw Open*. 2024;7(8):e2426248.  
doi:10.1001/jamanetworkopen.2024.26248

### **eAppendix.** Moral Distress Survey

This supplemental material has been provided by the authors to give readers additional information about their work.

# Moral Distress Survey

Please complete the survey below.

Thank you!

---

How old are you?

\_\_\_\_\_ (years old)

---

Which of the following best describes your race?  
(Choose ALL that apply)

- Black or African American  
 White  
 Asian or Asian American  
 Native American, Alaska Native, or American Indian  
 Native Hawaiian or Pacific Islander  
 Other: \_\_\_\_\_  
 Don't know  
 Prefer not to answer
- 

Are you Hispanic, Latino, or Latinx?

- Yes  
 No  
 Don't know  
 Prefer not to answer
- 

How would you describe your gender? (Choose ALL that apply)

- Woman  
 Man  
 Transgender Woman  
 Transgender Man  
 Non-binary  
 Gender fluid  
 Other: please specify below \_\_\_\_\_  
 Don't know  
 Prefer not to answer
- 

How many years have you been providing abortion care?

\_\_\_\_\_ (years)

---

Are you currently in training (such as in residency, fellowship, or clinicals)?

- yes  
 no  
 prefer not to answer
- 

Currently, what stage are you in your training?

- Residency  
 Fellowship  
 Clinicals  
 Other: \_\_\_\_\_  
 Don't know  
 Prefer not to answer
- 

What is your role in healthcare? (choose one)

- Physician  
 Nurse  
 Advanced Practice Provider  
 Don't know  
 Prefer not to answer
- 

What kind of physician are you? (choose one)

- Ob/Gyn  
 Family Medicine  
 Other: \_\_\_\_\_  
 Don't know  
 Prefer not to answer

---

Have you completed a Complex Family Planning Fellowship? (Choose ALL that apply)

- Yes
- No
- I am currently completing a Complex Family Planning Fellowship
- I am planning on completing a Complex Family Planning Fellowship
- Don't know
- Prefer not to answer

---

Are you board certified in Complex Family Planning? (Choose all that apply)

- Yes
- No and I do not plan on taking Complex Family Planning boards
- No but I plan on taking Complex Family Planning boards
- I am not eligible to take the Complex Family Planning boards
- Don't know
- Prefer not to answer

---

What kind of Advanced Practice Provider are you? (Choose one)

- Nurse Practitioner
- Physician Assistant
- Certified Nurse Midwife
- Certified Registered Nurse Anesthetist
- Other: \_\_\_\_\_
- Don't know
- Prefer not to answer

**Now we will ask you some questions about your abortion care practice. When we use the words "Dobbs decision" in this survey, we are referring to the Supreme Court of the United States decision in Dobbs v Jackson Women's Health Organization from June 24, 2022.**

Are you currently engaged in abortion provision?

- yes
- no
- prefer not to answer

Currently, what percentage of your own clinical practice includes abortion care?

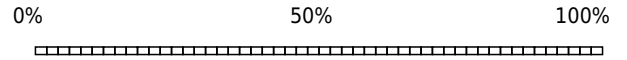

(Place a mark on the scale above)

---

In what state or states do you currently provide abortion care? (Check ALL that apply)

- AL : Alabama
- AK : Alaska
- AZ : Arizona
- AR : Arkansas
- CA : California
- CO : Colorado
- CT : Connecticut
- DC : District of Columbia
- DE : Delaware
- FL : Florida
- GA : Georgia
- HI : Hawaii
- ID : Idaho
- IL : Illinois
- IN : Indiana
- IA : Iowa
- KS : Kansas
- KY : Kentucky
- LA : Louisiana
- ME : Maine
- MD : Maryland
- MA : Massachusetts
- MI : Michigan
- MN : Minnesota
- MS : Mississippi
- MO : Missouri
- MT : Montana
- NE : Nebraska
- NV : Nevada
- NH : New Hampshire
- NJ : New Jersey
- NM : New Mexico
- NY : New York
- NC : North Carolina
- ND : North Dakota
- OH : Ohio
- OK : Oklahoma
- OR : Oregon
- PA : Pennsylvania
- RI : Rhode Island
- SC : South Carolina
- SD : South Dakota
- TN : Tennessee
- TX : Texas
- UT : Utah
- VT : Vermont
- VA : Virginia
- WA : Washington
- WV : West Virginia
- WI : Wisconsin
- WY : Wyoming
- Outside of the United States
- Other
- Don't know
- Prefer not to answer

What state is the PRIMARY setting in which you currently provide abortion care? (Choose ONLY one)

- AL : Alabama
- AK : Alaska
- AZ : Arizona
- AR : Arkansas
- CA : California
- CO : Colorado
- CT : Connecticut
- DC : District of Columbia
- DE : Delaware
- FL : Florida
- GA : Georgia
- HI : Hawaii
- ID : Idaho
- IL : Illinois
- IN : Indiana
- IA : Iowa
- KS : Kansas
- KY : Kentucky
- LA : Louisiana
- ME : Maine
- MD : Maryland
- MA : Massachusetts
- MI : Michigan
- MN : Minnesota
- MS : Mississippi
- MO : Missouri
- MT : Montana
- NE : Nebraska
- NV : Nevada
- NH : New Hampshire
- NJ : New Jersey
- NM : New Mexico
- NY : New York
- NC : North Carolina
- ND : North Dakota
- OH : Ohio
- OK : Oklahoma
- OR : Oregon
- PA : Pennsylvania
- RI : Rhode Island
- SC : South Carolina
- SD : South Dakota
- TN : Tennessee
- TX : Texas
- UT : Utah
- VT : Vermont
- VA : Virginia
- WA : Washington
- WV : West Virginia
- WI : Wisconsin
- WY : Wyoming
- Outside of the United States
- Other
- Don't know
- Prefer not to answer

---

In what settings do you currently provide abortion care? (Choose ALL that apply)

- Community Hospital
- Academic Hospital
- State Funded Institution
- Planned Parenthood
- Independent free standing abortion clinic (excluding Planned Parenthood)
- Telehealth
- Other: \_\_\_\_\_
- Don't know
- Prefer not to answer

---

What is the PRIMARY setting in which you provide abortion care? (Choose ONLY one)

- Community Hospital
- Academic Hospital
- State Funded Institution
- Planned Parenthood
- Independent free standing abortion clinic (excluding Planned Parenthood)
- Telehealth
- Other
- Don't know
- Prefer not to answer

---

Were you providing abortion care in the year leading up to the Dobbs decision (ie. anytime between May 2021 and May 2022)?

- Yes
- No
- Prefer not to answer

---

In the year prior to the Dobbs decision, what percentage of your own clinical practice included abortion care?

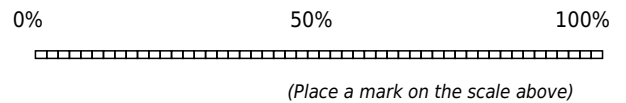

---

In what state or states did you provide abortion care in the year prior to the Dobbs decision?

- AL : Alabama
- AK : Alaska
- AZ : Arizona
- AR : Arkansas
- CA : California
- CO : Colorado
- CT : Connecticut
- DC : District of Columbia
- DE : Delaware
- FL : Florida
- GA : Georgia
- HI : Hawaii
- ID : Idaho
- IL : Illinois
- IN : Indiana
- IA : Iowa
- KS : Kansas
- KY : Kentucky
- LA : Louisiana
- ME : Maine
- MD : Maryland
- MA : Massachusetts
- MI : Michigan
- MN : Minnesota
- MS : Mississippi
- MO : Missouri
- MT : Montana
- NE : Nebraska
- NV : Nevada
- NH : New Hampshire
- NJ : New Jersey
- NM : New Mexico
- NY : New York
- NC : North Carolina
- ND : North Dakota
- OH : Ohio
- OK : Oklahoma
- OR : Oregon
- PA : Pennsylvania
- RI : Rhode Island
- SC : South Carolina
- SD : South Dakota
- TN : Tennessee
- TX : Texas
- UT : Utah
- VT : Vermont
- VA : Virginia
- WA : Washington
- WV : West Virginia
- WI : Wisconsin
- WY : Wyoming
- Outside of the United States
- Other
- Don't know
- Prefer not to answer



What state was the PRIMARY state in which you provided abortion care in the year prior to the Dobbs decision?  
(Choose ONLY one)

- AL : Alabama
- AK : Alaska
- AZ : Arizona
- AR : Arkansas
- CA : California
- CO : Colorado
- CT : Connecticut
- DC : District of Columbia
- DE : Delaware
- FL : Florida
- GA : Georgia
- HI : Hawaii
- ID : Idaho
- IL : Illinois
- IN : Indiana
- IA : Iowa
- KS : Kansas
- KY : Kentucky
- LA : Louisiana
- ME : Maine
- MD : Maryland
- MA : Massachusetts
- MI : Michigan
- MN : Minnesota
- MS : Mississippi
- MO : Missouri
- MT : Montana
- NE : Nebraska
- NV : Nevada
- NH : New Hampshire
- NJ : New Jersey
- NM : New Mexico
- NY : New York
- NC : North Carolina
- ND : North Dakota
- OH : Ohio
- OK : Oklahoma
- OR : Oregon
- PA : Pennsylvania
- RI : Rhode Island
- SC : South Carolina
- SD : South Dakota
- TN : Tennessee
- TX : Texas
- UT : Utah
- VT : Vermont
- VA : Virginia
- WA : Washington
- WV : West Virginia
- WI : Wisconsin
- WY : Wyoming
- Outside of the United States
- Other
- Don't know
- Prefer not to answer

---

In what setting did you provide abortion care in the year prior to the Dobbs decision? (Choose ALL that apply)

- Community Hospital
- Academic Hospital
- State Funded Institution
- Planned Parenthood
- Independent free standing abortion clinic (excluding Planned Parenthood)
- Telemedicine
- Other
- Don't know
- Prefer not to answer

---

Please specify the setting in which you provided abortion care in the year prior to the Dobbs decision: \_\_\_\_\_

---

What was the PRIMARY setting in which you provided abortion care in the year prior to the Dobbs decision? (Choose ONLY one)

- Community Hospital
- Academic Hospital
- State Funded Institution
- Planned Parenthood
- Independent free standing abortion clinic (excluding Planned Parenthood)
- Telemedicine
- Other
- Don't know
- Prefer not to answer

---

Now we are going to ask you some questions about your experience of Moral Distress in your clinical practice.

Moral distress occurs when you believe you know the ethically correct thing to do, but something or someone restricts your ability to pursue the right course of action.

Here is a moral distress thermometer:



---

Please briefly describe or name the federal, state, local, or institutional policy besides the Dobbs decision that has most contributed to your experience of moral distress and when this policy change occurred. (You can choose to leave this box blank)

---

Since the policy change that you describe above, have you been experiencing more or less moral distress?

- I have been experiencing MORE moral distress.  
 I have been experiencing LESS moral distress.  
 My experience of moral distress has stayed THE SAME.

**Now we are going to ask you questions about how your abortion care practice has changed since the Dobbs decision in the US state you selected.**

Has abortion care become severely restricted or no longer legal in the US state you selected?

Yes  
 No  
 Don't know  
 Prefer not to answer  
 Not applicable

Has abortion care become more accessible and less restricted in the US state you selected?

Yes  
 No  
 Don't know  
 Prefer not to answer  
 Not Applicable

Are you seeing more patients in your practice seeking abortion care in the US state you selected?

Yes  
 No  
 Don't know  
 Prefer not to answer  
 Not Applicable

Has a healthcare facility where you used to provide abortion care closed or stopped providing abortion care in the US state you selected?

Yes  
 No  
 Don't know  
 Prefer not to answer  
 Not Applicable

Have you reduced your abortion care practice or stopped providing abortion care because of concerns that you will face legal or professional consequences for providing abortion care in the US state you selected?

Yes  
 No  
 Don't know  
 Prefer not to answer  
 Not Applicable

Have you reduced your abortion care practice or stopped providing abortion care because of concerns related to your safety and/or the safety of family members/housemates in the US state you selected?

Yes  
 No  
 Don't know  
 Prefer not to answer  
 Not Applicable

Have you retired from healthcare in the US state you selected?

Yes  
 No  
 Don't know  
 Prefer not to answer  
 Not Applicable

Has your practice changed for reasons unrelated to abortion laws in the US state you selected?

Yes  
 No  
 Don't know  
 Prefer not to answer  
 Not Applicable

Please specify the way your practice has changed:

---

---

Has your practice changed for another reason not listed above in the US state you selected?

- Yes
- No
- Don't know
- Prefer not to answer
- Not Applicable

---

Please specify the unlisted reason that your practice has changed:

---

---

Would you like to answer the above questions related to moral distress and changes to your practice for another US state?

- Yes
- No

Ok, great! Please select again from the following list ONE of the US states in which you practice and keep this clinical setting in mind when you answer the following questions.

For those who practice in more than one US state, you will have the option to answer these questions up to three times. For those who practice only in one US state, you don't need to answer these questions again.

- AL : Alabama     AK : Alaska
- AZ : Arizona     AR : Arkansas
- CA : California     CO : Colorado
- CT : Connecticut     DC : District of Columbia
- DE : Delaware
- FL : Florida     GA : Georgia
- HI : Hawaii     ID : Idaho
- IL : Illinois     IN : Indiana
- IA : Iowa     KS : Kansas
- KY : Kentucky     LA : Louisiana
- ME : Maine     MD : Maryland
- MA : Massachusetts     MI : Michigan
- MN : Minnesota     MS : Mississippi
- MO : Missouri     MT : Montana
- NE : Nebraska     NV : Nevada
- NH : New Hampshire
- NJ : New Jersey     NM : New Mexico
- NY : New York     NC : North Carolina
- ND : North Dakota     OH : Ohio
- OK : Oklahoma     OR : Oregon
- PA : Pennsylvania     RI : Rhode Island
- SC : South Carolina     SD : South Dakota
- TN : Tennessee     TX : Texas
- UT : Utah     VT : Vermont
- VA : Virginia     WA : Washington
- WV : West Virginia     WI : Wisconsin
- WY : Wyoming     Outside of the United States
- Other     Don't know
- Prefer not to answer

Now we are going to ask you again some questions about your experience of Moral Distress in the US State you selected above.

Just as a reminder: Moral distress occurs when you believe you know the ethically correct thing to do, but something or someone restricts your ability to pursue the right course of action.

Here is a moral distress thermometer:

Please select the NUMBER (0 to 10) on the Moral Distress Thermometer that best describes how much moral distress you are experiencing related to your abortion care practice (or lack of abortion care practice) in the US state you selected.

10 means that you are experiencing extreme distress regarding to your abortion care practice (or lack of abortion care practice) and 0 means that you are experiencing no distress regarding your abortion care practice.

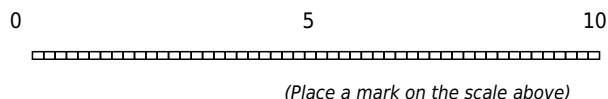

Which of the following describes your level of moral distress since the Dobbs decision in the US state you selected?

- I have been experiencing MORE moral distress since the Dobbs decision.
- I have been experiencing LESS moral distress since the Dobbs decision.
- My experience of moral distress has stayed THE SAME since the Dobbs decision.

---

Besides any changes to your abortion care practice that happened at the time of the Dobbs decision, is there another federal, state, local, or institutional policy that has most contributed to your experience of moral distress in your abortion care practice (or lack of abortion care practice) in the US state you selected?

- Yes    No    Don't know  
 Prefer not to answer  
 Not Applicable

---

Please briefly describe or name the federal, state, local, or institutional policy besides the Dobbs decision that has most contributed to your experience of moral distress and when this policy change occurred. (You can choose to leave this box blank)

---



**Now we are going to ask you questions about how your abortion care practice has changed since the Dobbs decision in the US state you selected.**

Since the policy change that you describe above, have you been experiencing more or less moral distress in the US state you selected?

- I have been experiencing MORE moral distress.  
 I have been experiencing LESS moral distress.  
 My experience of moral distress has stayed THE SAME.

Has abortion care become severely restricted or no longer legal in the US state you selected?

- Yes  
 No  
 Don't know  
 Prefer not to answer  
 Not applicable

Has abortion care become more accessible and less restricted in the US state you selected?

- Yes  
 No  
 Don't know  
 Prefer not to answer  
 Not Applicable

Are you seeing more patients in your practice in the US state you selected seeking abortion care?

- Yes  
 No  
 Don't know  
 Prefer not to answer  
 Not Applicable

Has a healthcare facility where you used to provide abortion care in the US state you selected closed or stopped providing abortion care?

- Yes  
 No  
 Don't know  
 Prefer not to answer  
 Not Applicable

Have you reduced your abortion care practice or stopped providing abortion care because of concerns that you will face legal or professional consequences for providing abortion care in the US state you selected?

- Yes  
 No  
 Don't know  
 Prefer not to answer  
 Not Applicable

Have you reduced your abortion care practice or stopped providing abortion care because of concerns related to your safety and/or the safety of family members/housemates in the US state you selected?

- Yes  
 No  
 Don't know  
 Prefer not to answer  
 Not Applicable

Have you retired from healthcare in the US state you selected?

- Yes  
 No  
 Don't know  
 Prefer not to answer  
 Not Applicable

Has your practice changed for reasons unrelated to abortion laws in the US state you selected?

- Yes  
 No  
 Don't know  
 Prefer not to answer  
 Not Applicable

Please specify the way your practice has changed:

---

---

Has your practice changed for another reason not listed above in the US state you selected?

- Yes
- No
- Don't know
- Prefer not to answer
- Not Applicable

---

Please specify the unlisted reason that your practice has changed:

---

---

Would you like to answer the above questions related to moral distress and changes to your practice for another US state?

- Yes
- No

Okay, great! Please select again from the following list ONE of the US states in which you practice and keep this clinical setting in mind when you answer the following questions.

For those who practice in more than two US states, this will be the third and final setting that we will be asking about. For those who practice in one or two US states, you don't need to answer these questions again.

- AL : Alabama     AK : Alaska  
 AZ : Arizona     AR : Arkansas  
 CA : California     CO : Colorado  
 CT : Connecticut     DC : District of Columbia  
 DE : Delaware  
 FL : Florida     GA : Georgia  
 HI : Hawaii     ID : Idaho  
 IL : Illinois     IN : Indiana  
 IA : Iowa     KS : Kansas  
 KY : Kentucky     LA : Louisiana  
 ME : Maine     MD : Maryland  
 MA : Massachusetts     MI : Michigan  
 MN : Minnesota     MS : Mississippi  
 MO : Missouri     MT : Montana  
 NE : Nebraska     NV : Nevada  
 NH : New Hampshire  
 NJ : New Jersey     NM : New Mexico  
 NY : New York     NC : North Carolina  
 ND : North Dakota     OH : Ohio  
 OK : Oklahoma     OR : Oregon  
 PA : Pennsylvania     RI : Rhode Island  
 SC : South Carolina     SD : South Dakota  
 TN : Tennessee     TX : Texas  
 UT : Utah     VT : Vermont  
 VA : Virginia     WA : Washington  
 WV : West Virginia     WI : Wisconsin  
 WY : Wyoming     Outside of the United States  
 Other     Don't know  
 Prefer not to answer

Now we are going to ask you again some questions about your experience of Moral Distress in the US State you selected above.

Just as a reminder: Moral distress occurs when you believe you know the ethically correct thing to do, but something or someone restricts your ability to pursue the right course of action.

Here is a moral distress thermometer:

Please select the NUMBER (0 to 10) on the Moral Distress Thermometer that best describes how much moral distress you are experiencing related to your abortion care practice (or lack of abortion care practice) in the US state you have selected.

10 means that you are experiencing extreme distress regarding to your abortion care practice (or lack of abortion care practice) and 0 means that you are experiencing no distress regarding your abortion care practice.

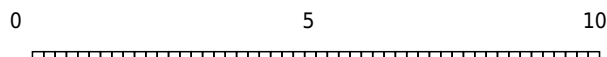

(Place a mark on the scale above)

Which of the following describes your level of moral distress since the Dobbs decision in the US state you selected?

- I have been experiencing MORE moral distress since the Dobbs decision.  
 I have been experiencing LESS moral distress since the Dobbs decision.  
 My experience of moral distress has stayed THE SAME since the Dobbs decision.

---

Besides any changes to your abortion care practice that happened at the time of the Dobbs decision, is there another federal, state, local, or institutional policy that has most contributed to your experience of moral distress in your abortion care practice (or lack of abortion care practice) in the US state you selected?

- Yes    No    Don't know  
 Prefer not to answer  
 Not Applicable

---

Please briefly describe or name the federal, state, local, or institutional policy besides the Dobbs decision that has most contributed to your experience of moral distress and when this policy change occurred. (You can choose to leave this box blank)

---

---

Since the policy change that you describe above, have you been experiencing more or less moral distress?

- I have been experiencing MORE moral distress.  
 I have been experiencing LESS moral distress.  
 My experience of moral distress has stayed THE SAME.

**Now we are going to ask you questions about how your abortion care practice has changed since the Dobbs decision in the US state you selected.**

Has abortion care become severely restricted or no longer legal in the US state you selected?

Yes  
 No  
 Don't know  
 Prefer not to answer  
 Not applicable

Are you seeing more patients seeking abortion care in your practice in the US state you selected?

Yes  
 No  
 Don't know  
 Prefer not to answer  
 Not Applicable

Has a healthcare facility where you used to provide abortion care closed or stopped providing abortion care in the US state you selected?

Yes  
 No  
 Don't know  
 Prefer not to answer  
 Not Applicable

Have you reduced your abortion care practice or stopped providing abortion care because of concerns that you will face legal or professional consequences for providing abortion care in the US state you selected?

Yes  
 No  
 Don't know  
 Prefer not to answer  
 Not Applicable

Have you retired from healthcare in the US state you selected?

Yes  
 No  
 Don't know  
 Prefer not to answer  
 Not Applicable

Has your practice changed for reasons unrelated to abortion laws in the US state you selected?

Yes  
 No  
 Don't know  
 Prefer not to answer  
 Not Applicable

Please specify the way your practice has changed:

\_\_\_\_\_

Has your practice changed for another reason not listed above in the US state you selected?

Yes  
 No  
 Don't know  
 Prefer not to answer  
 Not Applicable

Please specify the unlisted reason that your practice has changed:

\_\_\_\_\_

You have reached the end of the survey questions. We have a few optional open-ended questions below that you are welcome to but not expected to complete. Would you be interested in answering these questions?

Yes  
 No

---

Click here to be directed to a separate survey where you can share your email address for compensation purposes

Take me to the compensation survey
