# Supplementary material for: State Abortion Policy and Moral Distress Among Clinicians Providing Abortion After the Dobbs Decision
Source: PubMed Central journal article supplement (PMC11294965; doi:10.1001/jamanetworkopen.2024.26248), 2024-08-01
Supplement: jamanetwopen-e2426248-s002.pdf [file jamanetwopen-e2426248-s002.pdf]

## Data Sharing Statement

Rivlin. State Abortion Policy and Moral Distress Among Clinicians Providing Abortion After the Dobbs Decision. *JAMA Netw Open*. Published August 01, 2024.

doi:10.1001/jamanetworkopen.2024.26248

### Data

**Data available:** No

### Additional Information

**Explanation for why data not available:** Given the legal complexity of abortion care in the United States, provider data will not be shared
